# Supplementary material
Source: PubMed Central journal article supplement (PMC4901140)

SUPPLEMENTARY MATERIAL

Supplemental Figure 1

A

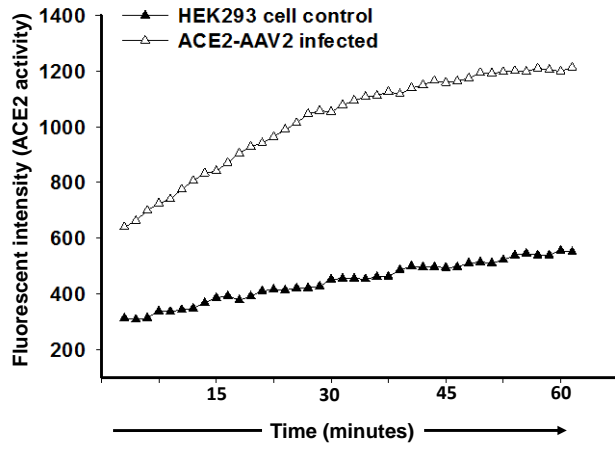

B

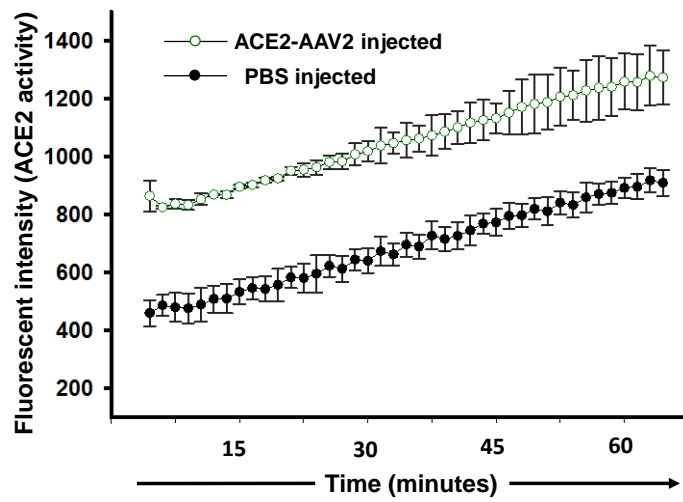

C

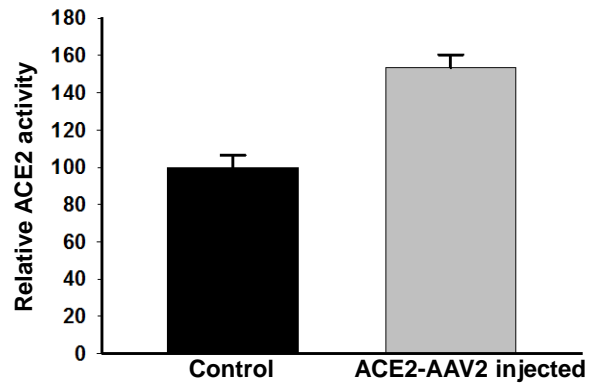

Supplement: mmc1.pdf [file mmc1.pdf]
